# Supplementary material
Source: publisher site journal article supplement (https://www.dovepress.com/article/424554)
Supplement: Supplementary file 1 [file get_supplementary_file.php]

## Demographics (Page 1/5)

What is your year in residency?

- PGY-1
- PGY-2
- PGY-3
- PGY-4
- Other (PGY)

What year did you complete medical school?

- Before 2019
- 2019
- 2020
- 2021
- 2022

What is your gender?

- Female
- Male
- Non-binary
- Other

What is the setting of your residency?

- Academic or university based
- Community hospital based
- Other

What medical degree do you hold?

- MD
- DO
- Other

What are your post-residency plans?

- Practice general OB/GYN
- Fellowship
- Other
- I don't know

If you answered "fellowship" in the question above, which do you plan to pursue?

- Pelvic medicine and reconstructive surgery
- Gynecologic oncology
- Maternal fetal medicine
- Reproductive endocrinology and infertility
- Complex family planning
- Minimally invasive gynecology surgery
- Other

## Endometriosis Education and Diagnosis (Page 2/5)

Have you encountered any patients with endometriosis?  Yes  
 No  
 I don't know

Have you worked with any faculty who specialize in endometriosis?  Yes  
 No  
 I don't know

Have you used the following sources to learn about endometriosis during residency? Mark all that apply.

- Residency lectures
- Up To Date articles
- Professional consensus bulletins (e.g. ACOG practice bulletins)
- Primary literature (e.g. ACOG, AJOG articles)
- Discussions with others (e.g. attendings, senior residents)
- None

On average, how many formal lectures or teaching sessions have you had about endometriosis in the past year?  0  
 1  
 2  
 3+

|                                                                                                                     | Strongly Disagree     | Disagree              | Neutral               | Agree                 | Strongly Agree        |
|---------------------------------------------------------------------------------------------------------------------|-----------------------|-----------------------|-----------------------|-----------------------|-----------------------|
| I feel that in general, my attendings are knowledgeable enough about endometriosis diagnosis to discuss it with me  | <input type="radio"/> |
| I feel that in general, my attendings are knowledgeable enough about endometriosis management to discuss it with me | <input type="radio"/> |
| I can reliably recognize the common symptoms of endometriosis                                                       | <input type="radio"/> |
| I can reliably recognize an endometrioma on ultrasound                                                              | <input type="radio"/> |

## Endometriosis Medical Management (Page 3/5)

Do you agree with the following statement?

- Yes  
 No  
 I don't know

It is acceptable to treat a patient for suspicion of endometriosis without first obtaining a surgical diagnosis.

Have you seen an attending prescribe or manage any of the following for endometriosis? (select all that apply)

- Non-steroidal anti-inflammatory drugs (NSAIDs)  
 Combined oral contraceptive pills  
 Progestin only contraceptive pills  
 Long-acting reversible contraception (LNG-IUD/Mirena or implant/Nexplanon)  
 Depo provera  
 GnRH antagonist (e.g. elagolix/Orilissa)  
 GnRH agonist (e.g. leuprolide/Lupron)  
 Aromatase inhibitor (e.g. letrozole/Femara)  
 Androgen (e.g. danazol/Danocrine)  
 None

Have you or would you feel comfortable prescribing or managing any of the following for endometriosis? (select all that apply)

- Non-steroidal anti-inflammatory drugs (NSAIDs)  
 Combined oral contraceptive pills  
 Progestin only contraceptive pills  
 Long-acting reversible contraception (LNG-IUD/Mirena or implant/Nexplanon)  
 Depo provera  
 GnRH antagonist (e.g. elagolix/Orilissa)  
 GnRH agonist (e.g. leuprolide/Lupron)  
 Aromatase inhibitor (e.g. letrozole/Femara)  
 Androgen (e.g. danazol/Danocrine)  
 None

|                                                                                                                                                 | Strongly Disagree     | Disagree              | Neutral               | Agree                 | Strongly Agree        |
|-------------------------------------------------------------------------------------------------------------------------------------------------|-----------------------|-----------------------|-----------------------|-----------------------|-----------------------|
| I feel comfortable managing the hypoestrogenic effects of GnRH antagonists, agonists, and aromatase inhibitors                                  | <input type="radio"/> |
| I feel comfortable counseling patients about the osteoporotic risk of GnRH antagonists, agonists, and aromatase inhibitors                      | <input type="radio"/> |
| I feel comfortable with the recommendations about when to prescribe add-back progestin for GnRH antagonists, agonists, and aromatase inhibitors | <input type="radio"/> |

Have you ever had exposure to a patient being referred to the following for alternative management of their endometriosis? Mark all that apply.

- Physical therapy (e.g. pelvic floor physical therapy)  
 Gastroenterology  
 Urology  
 Chronic pain specialist  
 Mental health  
 Nutrition  
 None

## Endometriosis Surgical Management (Page 4/5)

Have you ever participated in surgery for endometriosis diagnosis and/or management?

- Yes
- No
- I don't know

Have you had exposure to the following tools for methods of excising or ablating endometriotic lesions? Mark all that apply.

- Laser vaporization (e.g. CO2, KTP, argon beam)
- Electrosurgical fulguration (Ablation with monopolar or bipolar energy)
- Sharp excision of lesions (e.g. with scissors)
- Removal of endometrioma (cystectomy or oophorectomy)
- None

Do you feel comfortable recognizing intra-operative findings of endometriosis? Mark all that apply.

- Classic lesions (e.g. powder burn)
- Non-classic lesions (white/fibrotic, blue, clear)
- Endometrioma
- None

**LAST PAGE!**

**How do you feel about the following statements?**

|                                                                                                         | Strongly Disagree     | Disagree              | Neutral               | Agree                 | Strongly Agree        |
|---------------------------------------------------------------------------------------------------------|-----------------------|-----------------------|-----------------------|-----------------------|-----------------------|
| It is important to learn about endometriosis in residency                                               | <input type="radio"/> |
| If I were to be in practice on my own today, I would feel comfortable diagnosing endometriosis          | <input type="radio"/> |
| If I were to be in practice on my own today, I would feel comfortable medically managing endometriosis  | <input type="radio"/> |
| If I were to be in practice on my own today, I would feel comfortable surgically managing endometriosis | <input type="radio"/> |

What are ways in which you would like to learn more about endometriosis?

- Resident lectures or didactics
- Grand Rounds
- Reading on my own (e.g. ACOG practice bulletins, Up To Date, primary literature)
- Hands on learning (e.g. reading about or talking to attendings about specific patients)
- Surgical videos
- Other

What are other ways in which you would like to learn more about endometriosis?

---
